# Supplementary material
Source: bioRxiv or medRxiv preprint supplement (https://www.biorxiv.org/highwire/filestream/117885/field_highwire_adjunct_files/2/387639-3.pdf)
Supplement: Supplementary file [file 387639-3.pdf]

# Systematic dissection of biases in whole-exome and whole-genome sequencing reveals major determinants of coding sequence coverage

Yury A. Barbitoff<sup>1,2,3,4</sup>, Dmitrii E. Polev<sup>2</sup>, Irina V. Shcherbakova<sup>2</sup>, Artem M. Kiselev<sup>5</sup>, Andrey S. Glotov<sup>2</sup>, Elena A. Serebryakova<sup>2</sup>, Anna A. Kostareva<sup>5</sup>, Oleg S. Glotov<sup>3,6</sup>, and Alexander V. Predeus<sup>1\*</sup>

<sup>1</sup>Bioinformatics Institute, Saint Petersburg, Russia,

<sup>2</sup>Biobank of the Research park, Saint-Petersburg State University, Saint Petersburg, Russia,

<sup>3</sup>Department of Genetics and Biotechnology, Saint-Petersburg State University, Saint Petersburg, Russia,

<sup>4</sup>Institute of Translational Biomedicine, Saint-Petersburg State University, Saint Petersburg, Russia

<sup>5</sup>Almazov National Medical Research Centre, Saint Petersburg, Russia,

<sup>6</sup>City Hospital №40, Saint Petersburg, Russia

\*To whom correspondence should be addressed: [predeus@bioinf.me](mailto:predeus@bioinf.me), Bioinformatics Institute, Kantermirovskaya st. 2A, St. Petersburg, 199034, Russia.

## Table of contents

## Supplementary Figures

1

## Supplementary Figures

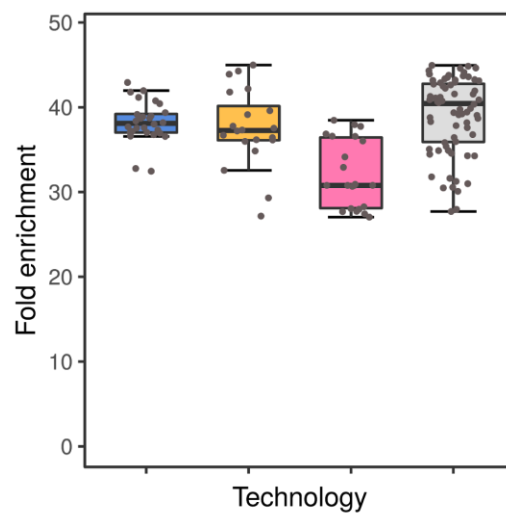

Capture technology: ■ SureSelect ■ Nextera Rapid ■ MedExome ■ TruSeq Exome

**Supplementary Figure 1.** Fold enrichment of CDS regions for WES samples included in the study.

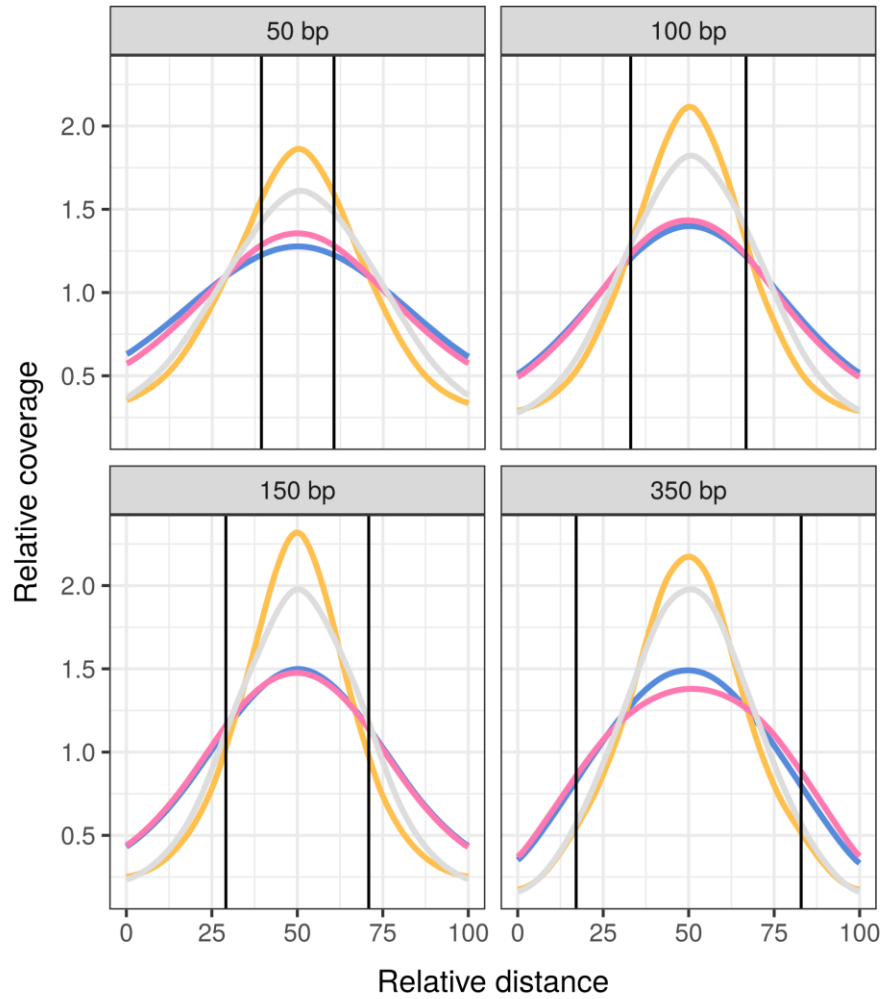

Capture technology: ■ SureSelect ■ Nextera Rapid ■ MedExome ■ TruSeq Exome

**Supplementary Figure 2.** Profiles of relative coverage within exons divided into 4 quartiles according to the length of an interval. 100 bp of flanking bases are included; solid lines delineate CDS margins.

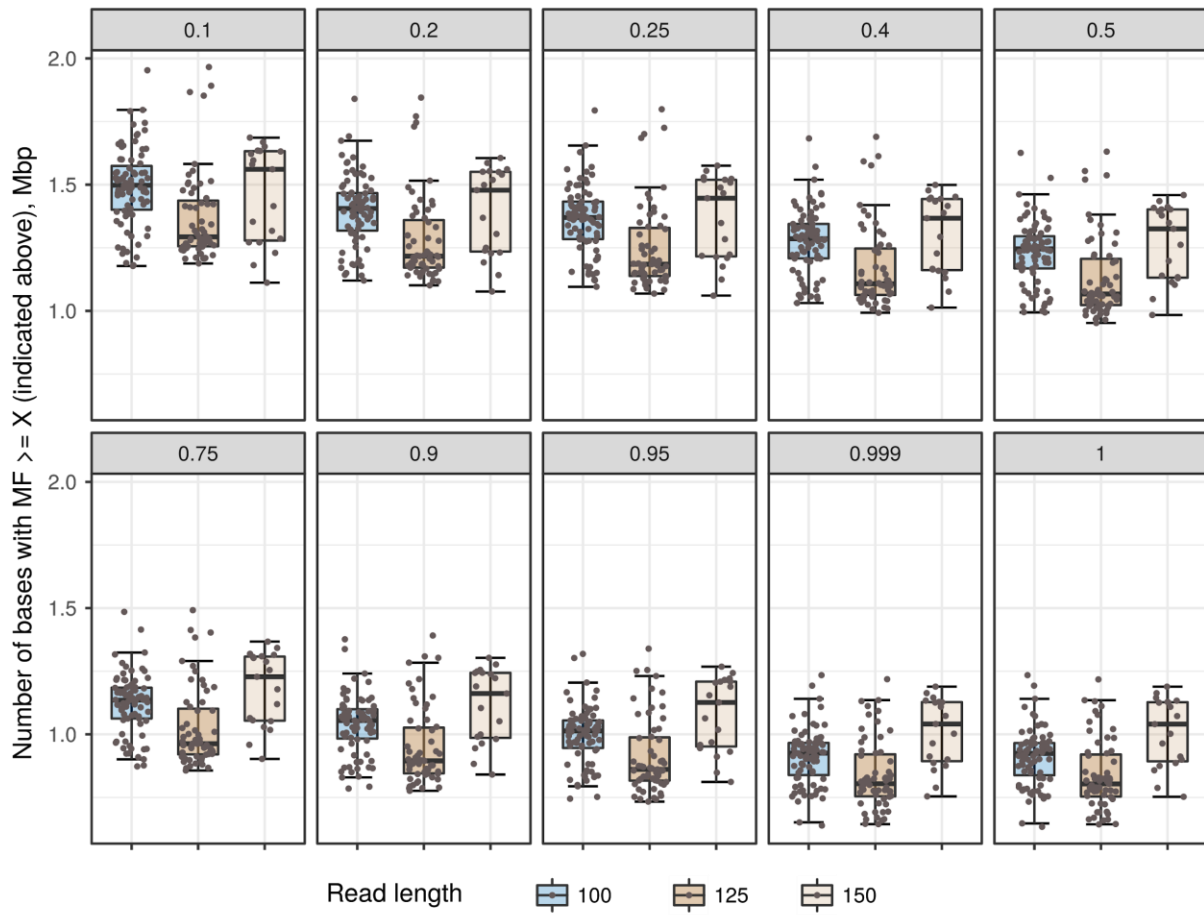

**Supplementary Figure 3.** The number of bases having an MF  $\geq X$  (indicated above each plot) for WES and WGS samples having indicated paired end read lengths.

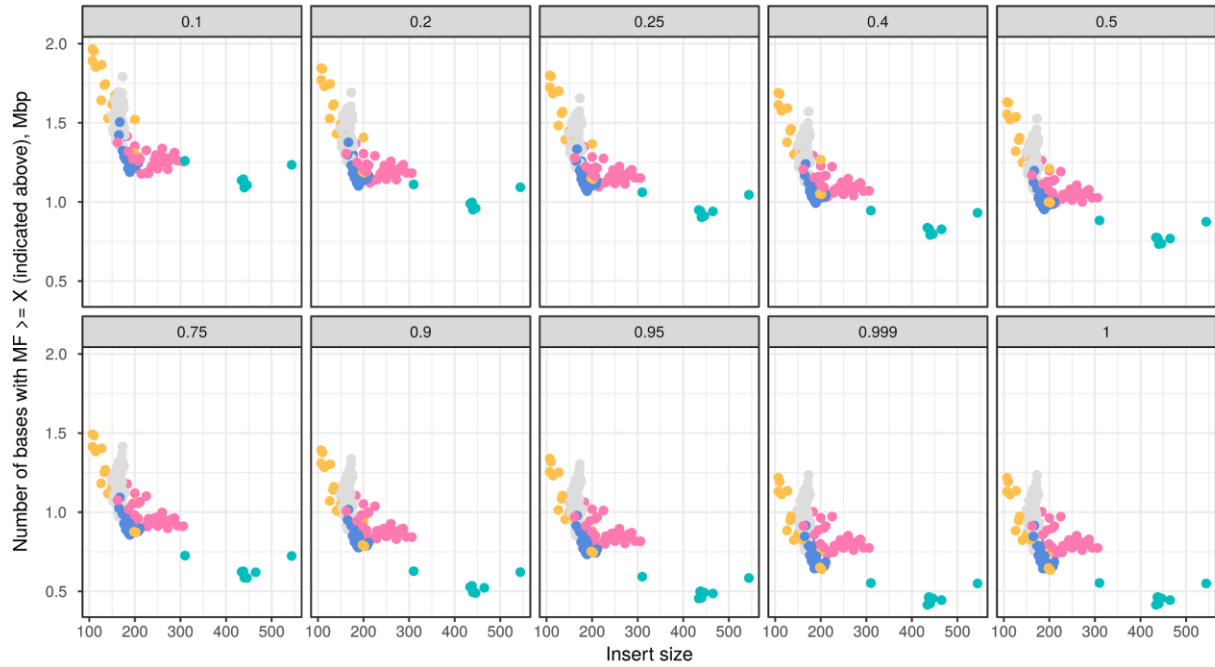

**Supplementary Figure 4.** The number of bases having an MF = X (indicated above each plot) for all samples plotted against the library mean insert size.
